# Supplementary material for: Antinuclear Antibodies in Patients with Psoriatic Arthritis Treated or Not with Biologics
Source: PubMed Central journal article supplement (PMC4521886; doi:10.1371/journal.pone.0134218), 2015-07-31
Supplement: pone.0134218.s001.pdf [file pone.0134218.s001.pdf]

| tient Num | Sexe | HLA-B  | HLA-DR    | HLA -C | ANA POS 1: 100 | ANA POS 1: 160 | Age at onset |
|-----------|------|--------|-----------|--------|----------------|----------------|--------------|
| 1         | F    | 38/53  | 102/13    | 4/12   | 1:800          | 1:1280         | NR           |
| 2         | F    | 35 /-  | NT        | NT     | 1:800          | ND             | 65           |
| 3         | F    | 51/ 51 | 7/12      | 15/ 15 | 1:800          | ND             | 14           |
| 4         | F    | 8/ 37  | 301/1454  | 6 /7   | 1:800          | ND             | 18           |
| 5         | F    | 8/ 52  | 03/14     | 7/ 7   | 1:800          | ND             | 43           |
| 6         | F    | 27/63  | 401/1103  | 1/ 3   | 1:800          | ND             | 45           |
| 7         | H    | NT     | NT        | NT     | 1:800          | 1:640          | 40           |
| 8         | F    | 35/49  | 01/1302   | 4/ 7   | 1:400          | 1:640          | NR           |
| 9         | F    | 39/ 55 | 11/16     | 3/ 12  | 1:400          | 1:320          | NR           |
| 10        | H    | 27 /60 | 01/ 0401  | NT     | 1:400          | ND             | 30           |
| 11        | F    | 18/21  | 301/1001  | 5/ 7   | 1:400          | ND             | 60           |
| 12        | F    | 8/ 27  | 3/ 7      | 6 /7   | 1:400          | ND             | 46           |
| 13        | F    | 7/ 35  | 13/15     | 4 /7   | 1:400          | ND             | 45           |
| 14        | F    | 35/53  | 13/15     | 4/NT   | 1:400          | ND             | 45           |
| 15        | f    | 44/44  | 0701/1101 | 16/16  | 1:400          | ND             | NR           |
| 16        | F    | 15/51  | 13/13     | 7/16   | 1:400          | ND             | 50           |
| 17        | F    | 27/50  | 07/11     | NT     | 1:400          | ND             | 42           |
| 18        | F    | 14/18  | 102/102   | 8/15   | 1:400          | ND             | 26           |
| 19        | F    | 40/44  | 701/1302  | NT     | 1:400          | ND             | 54           |
| 20        | F    | 39/ 50 | 102/07    | 6 12   | 1:400          | ND             | 13           |
| 21        | F    | 27/49  | 404/07    | 2/ 7   | 1:400          | ND             | 51           |
| 22        | F    | 7/ 40  | 1101/1501 | 2/ 7   | 1:400          | ND             | 50           |
| 23        | F    | 7/58   | 101/101   | 15/7   | 1:400          | ND             | 45           |
| 24        | F    | 8/27   | 11/14     | 2/ 7   | 1:400          | ND             | 40           |
| 25        | F    | 15/ 27 | 101/701   | 1 / 14 | 1:400          | ND             | 30           |
| 26        | H    | 40/35  | 07/13     | 2/ 4   | 1:400          | ND             | 30           |
| 27        | H    | 7/ 40  | 0101/0401 | 7/15   | 1:400          | ND             | 52           |
| 28        | H    | 7/ 27  | 701/1501  | 1 /7   | 1:400          | 1:320          | 54           |
| 29        | F    | 07/35  | 01/13     | NT     | 1:200          | 1:320          | 55           |
| 30        | F    | 07/13  | 07/15     | 6/7    | 1:200          | 1:320          | 35           |
| 31        | F    | 7/35   | 103/1501  | 4/ 7   | 1:200          | 1:320          | NR           |
| 32        | F    | 08/27  | 01/15     | 1/7    | 1:200          | 1:320          | NR           |
| 33        | F    | 8/ 35  | 03/11     | 4 /7   | 1:200          | 1:320          | NR           |
| 34        | F    | 8/18   | 01/03     | 7/NT   | 1:200          | 1:320          | 30           |
| 35        | F    | 14/45  | 01 11     | 8 /16  | 1:200          | 1:320          | NR           |
| 36        | F    | 39/49  | 07/1601   | 7/ 7   | 1:200          | 1:320          | 45           |
| 37        | F    | 7/14   | 07/08     | 7/8    | 1:200          | 1:320          | NR           |
| 38        | H    | 27/NT  | 11/12     | 2/8    | 1:200          | 1:320          | NR           |
| 39        | H    | 27/NT  | 01/11     | NT     | 1:200          | 1:160          | NR           |
| 40        | H    | 38 /51 | NT        | 12/14  | 1:200          | 1:320          | NR           |
| 41        | H    | 14/45  | 0405/701  | 6/8    | 1:200          | 1:320          | NR           |
| 42        | H    | 18 /51 | 03/11     | 5/15   | 1:200          | ND             | NR           |
| 43        | F    | 7/ 27  | 1301/1501 | NT     | 1:200          | ND             | 52           |
| 44        | F    | 08/51  | 11/15     | 7/15   | 1:200          | ND             | 41           |
| 45        | F    | 45/49  | 405/1101  | 6/ 7   | 1:200          | ND             | NR           |
| 46        | F    | NT     | NT        | NT     | 1:200          | ND             | 36           |
| 47        | F    | 13/ 44 | 1101/1502 | 5/6    | 1:200          | ND             | 60           |
| 48        | F    | 44/53  | 402/03    | NT     | 1:200          | ND             | 50           |
| 49        | F    | 50/58  | 405/13    | 7/14   | 1:200          | ND             | 35           |

|    |   |       |           |      |       |       |    |
|----|---|-------|-----------|------|-------|-------|----|
| 50 | F | 7/8   | 15/15     | 7/7  | 1:200 | ND    | 47 |
| 51 | F | 50/51 | 13/15     | 6/16 | 1:200 | ND    | 45 |
| 52 | F | NT    | NT        | NT   | 1:200 | ND    | 28 |
| 53 | F | 18/50 | 07/14     | NT   | 1:200 | ND    | 45 |
| 54 | F | 7/27  | 1001/1501 | 6/12 | 1:200 | ND    | 50 |
| 55 | F | 40/41 | 13/16     | 3/17 | 1:200 | ND    | 38 |
| 56 | f | 35/35 | 0301/1401 | 4/4  | 1:200 | ND    | 18 |
| 57 | F | 40/44 | 102/08    | 2/3  | 1:200 | ND    | 45 |
| 58 | F | 35/44 | 07/11     | NT   | 1:200 | ND    | 30 |
| 59 | F | 13/44 | 07/14     | 6/5  | 1:200 | ND    | 48 |
| 60 | F | 27/45 | 0701/1501 | 2/6  | 1:200 | ND    | 45 |
| 61 | F | 49/50 | 7/11      | 6/7  | 1:200 | ND    | 62 |
| 62 | H | 8/35  | 03/03     | NT   | 1:200 | 1:320 | 30 |
| 63 | F | 35/35 | 1401/1401 | NT   | 1:100 | 1:160 | NR |
| 64 | F | 27/35 | 15/16     | 2/4  | 1:100 | ND    | NR |
| 65 | F | 14/49 | 102/13    | 7/8  | 1:100 | 1:160 | 28 |
| 66 | F | 39/55 | NT        | 3/12 | 1:100 | 1:160 | NR |
| 67 | F | 14/45 | 0405/701  | 6/8  | 1:100 | 1:160 | NR |
| 68 | F | 18/57 | 10/11     | 6/NT | 1:100 | 1:160 | NR |
| 69 | F | 8/35  | 03/04     | 7/12 | 1:100 | 1:160 | 30 |
| 70 | F | NT    | 4/13      | NT   | 1:100 | 1:160 | 15 |
| 71 | F | 18/44 | 7/11      | NT   | 1:100 | 1:160 | 30 |
| 72 | F | 8/48  | NT        | NT   | 1:100 | 1:160 | 50 |
| 73 | F | 27/50 | 1/7       | 6/NT | 1:100 | 1:160 | 63 |
| 74 | F | 15/53 | 13/15     | 4/7  | 1:100 | ND    | 65 |
| 75 | F | 58/58 | 13/13     | 6/3  | 1:100 | ND    | 45 |
| 76 | F | 37/39 | 403/11    | 6/12 | 1:100 | ND    | 55 |
| 77 | H | 7/38  | 14/15     | NT   | 1:100 | 1:160 | NR |
| 78 | H | 07/40 | 08/15     | 3/7  | 1:100 | ND    | 55 |
| 79 | H | NT    | NT        | NT   | 1:100 | ND    | 55 |
| 80 | F | 18/44 | 0101/301  | 5/5  | 1:100 | ND    | 28 |
| 81 | F | 13/38 | 1401/1501 | 6/12 | 1:100 | ND    | 42 |
| 82 | F | 13/51 | 07/11     | 6/16 | 1:100 | ND    | 30 |
| 83 | F | 38/57 | 0401-07   | NT   | 1:100 | 1:160 | 52 |
| 84 | F | 18/27 | 03/16     | 2/5  | 1:100 | ND    | 20 |
| 85 | F | 13/49 | 101/701   | 6/6  | 1:100 | ND    | 10 |
| 86 | F | 13/57 | 7/7       | 6/6  | 1:100 | ND    | 50 |
| 87 | F | 51/57 | 7/14      | NT   | 1:100 | ND    | 45 |
| 88 | F | 49/53 | 13/13     | 4/7  | 1:100 | ND    | 30 |
| 89 | F | 35/NT | 407/1454  | NT   | 1:100 | ND    | 28 |
| 90 | F | 27/39 | 101/11    | NT   | 1:100 | ND    | 40 |
| 91 | F | 27/55 | 3/16      | 2/3  | 1:100 | ND    | 55 |
| 92 | F | 13/44 | 7/13      | 3/6  | 1:100 | ND    | 35 |
| 93 | F | 18/50 | 701/1301  | 6/14 | 1:100 | ND    | 45 |
| 94 | F | 44/53 | 1201/1303 | 4/5  | 1:100 | ND    | 52 |
| 95 | F | 35/40 | 404/13    | 6/NT | 1:100 | ND    | NR |
| 96 | F | 18/44 | 0102/11   | NT   | 1:100 | ND    | 20 |
| 97 | F | 8/49  | 03/11     | NT   | 1:100 | ND    | 55 |
| 98 | F | 8/55  | 07/11     | 1/7  | 1:100 | ND    | 30 |

|     |   |        |           |       |       |       |    |
|-----|---|--------|-----------|-------|-------|-------|----|
| 99  | F | 14/ 51 | 07/13     | NT    | 1:100 | ND    | 33 |
| 100 | F | 7/53   | 14/15     | 4/ 7  | 1:100 | ND    | 55 |
| 101 | F | 8/ 70  | 11/15     | 2/ 7  | 1:100 | ND    | 43 |
| 102 | F | 14/ 35 | 102/1301  | NT    | 1:100 | ND    | 50 |
| 103 | F | 15/ 44 | 701/701   | 12/16 | 1:100 | ND    | 35 |
| 104 | F | 35/ 44 | 701/1104  | 4 /4  | 1:100 | ND    | 25 |
| 105 | F | 27/ 52 | 12/15     | 3 /12 | 1:100 | ND    | 33 |
| 106 | F | 14/ 18 | 102/1501  | 8 /12 | 1:100 | ND    | 35 |
| 107 | F | 13/ 18 | 15/15     | 4/12  | 1:100 | ND    | 54 |
| 108 | F | 39/62  | 13/03     | NT    | 1:100 | ND    | 34 |
| 109 | F | 14/ 62 | 101/701   | 4 /8  | 1:100 | ND    | 37 |
| 110 | F | 44/ 55 | 7/12      | 1/ 16 | 1:100 | ND    | 50 |
| 111 | F | 27/-   | NT        | NT    | 1:100 | 1:160 | 34 |
| 112 | F | 38/39  | 1301/1601 | 12/12 | 1:100 | ND    | 20 |
| 113 | F | NT     | NT        | NT    | 1:100 | ND    | 30 |
| 114 | H | NT     | NT        | NT    | 1:100 | ND    | 50 |
| 115 | H | 45/ 50 | 402/7     | 6/ 5  | 1:100 | 1:160 | 60 |
| 116 | H | 53/35  | 0101/13   | NT    | 1:100 | ND    | 52 |
| 117 | H | 44/ 51 | 13/13     | NT    | 1:100 | 1:160 | 25 |
| 118 | H | 45/49  | 0401/11   | 6/ 7  | 1:100 | ND    | 30 |
| 119 | H | 38/ 40 | 404/1101  | 3 /12 | 1:100 | ND    | 48 |
| 120 | H | 35/50  | 701/1101  | NT    | 1:100 | ND    | 33 |
| 121 | H | 08/14  | 101/0301  | 7/ 8  | 1:100 | ND    | 55 |
| 122 | H | 37/52  | 401/08    | NT    | 1:100 | ND    | 48 |
| 123 | H | 15/ 51 | 401/1104  | 3/ 16 | 1:100 | ND    | 60 |
| 124 | H | 7/ 40  | 301/301   | 3 /7  | 1:100 | ND    | 50 |
| 125 | H | 50/57  | 07/NT     | 6/NT  | 1:100 | ND    | 20 |
| 126 | H | 8/ 13  | 701/1301  | 6/7   | 1:100 | ND    | 25 |
| 127 | H | 13/ 52 | 403/7     | 6 /12 | 1:100 | ND    | 40 |
| 128 | H | 35/58  | 1302/1401 | 4/ 7  | 1:100 | ND    | 50 |
| 129 | H | 8/ 44  | 3/7       | 4 7   | 1:100 | 1:160 | 40 |
| 130 | H | 18/44  | 07/11     | NT    | 1:100 | ND    | 25 |
| 131 | H | 2/ 18  | 0403/14   | NT    | 1:100 | ND    | 28 |
| 132 | H | 35/51  | 1 11/14   | NT    | 1:100 | ND    | 40 |
| 133 | F | 50/58  | 405/13    | NT    |       | ND    | 35 |
| 134 | F | 8/60   | 13/03     | 3/ 7  |       | ND    | 46 |
| 135 | F | 58/ 52 | 1/15      | NT    |       | 0     | 25 |
| 136 | F | 18/39  | 13/16     | 7/12  |       | ND    | 40 |
| 137 | F | 44/49  | 405/11    | 5/ 7  |       | 0     | 35 |
| 138 | F | 51 72  | 03/04:02  | 6/15  |       | ND    | NR |
| 139 | F | 46569  | 8/11      | 15/16 |       | ND    | 54 |
| 140 | F | 08/40  | 01, 15    | NT    |       | 0     | 40 |
| 141 | F | 47/67  | 101/113   | NT    |       | 0     | NR |
| 142 | F | 44/51  | 7/13      | NT    |       | ND    | 51 |
| 143 | F | 15/ 40 | 404/701   | 3 /4  |       | 0     | 30 |
| 144 | F | 7/ 7   | NT        | NT    |       | 0     | NR |
| 145 | F | 35/55  | 01/14     | 1/4   |       | ND    | NR |
| 146 | F | 44/57  | 401/701   | NT    |       | 0     | 35 |
| 147 | F | 13 49  | 07/11     | 6 /7  |       | 0     | NR |

|     |   |        |           |        |  |    |    |
|-----|---|--------|-----------|--------|--|----|----|
| 148 | F | 18/39  | 01/11     | 7/12   |  | ND | 33 |
| 149 | F | 27/ 27 | 08/15     | 2/ 2   |  | ND | 14 |
| 150 | F | 7/14   | 102/11    | NT     |  | ND | 37 |
| 151 | F | 35/35  | 101/1401  | NT     |  | 0  | 50 |
| 152 | F | 39/51  | 08/09     | NT     |  | ND | NR |
| 153 | F | 27/38  | 11/ 13    | NT     |  | ND | 45 |
| 154 | F | 08/15  | 103/111   | NT     |  | ND | 30 |
| 155 | F | 8/57   | 7/15      | 6/ 7   |  | ND | 35 |
| 156 | F | 61/63  | 1302/1601 | 7/ 7   |  | ND | 50 |
| 157 | F | 15/22  | 1 4/11    | 1/ 3   |  | ND | 65 |
| 158 | F | 37/55  | 301/1101  | 6 3    |  | ND | 25 |
| 159 | F | 15/56  | 11/13     | 1/ 2   |  | 0  | 44 |
| 160 | F | 15/44  | 07/12     | 3/ 5   |  | ND | 30 |
| 161 | F | 8/13   | 301/1104  | 6/ 7   |  | 0  | 45 |
| 162 | F | NT     | NT        | NT     |  | ND | 55 |
| 163 | F | 8/ 49  | 1501/1501 | 7/ 7   |  | ND | 40 |
| 164 | F | NT     | 102/11    | 7/ 7   |  | ND | 55 |
| 165 | F | 14/35  | 102/14    | 4/ 8   |  | 0  | 30 |
| 166 | F | 7/50   | 103/108   | 6/15   |  | ND | 36 |
| 167 | F | 41/51  | 03/04:05  | 6/15   |  | ND | 30 |
| 168 | F | 45/57  | 7/13      | NT     |  | 0  | 50 |
| 169 | F | 7/ 35  | 14/16     | 4/ 7   |  | ND | 45 |
| 170 | F | 38/57  | 07/13     | 6/12   |  | ND | 40 |
| 171 | F | 18/18  | 101/103   | 5/ 7   |  | ND | 47 |
| 172 | F | 18/4   | 11/14     | 5/15   |  | ND | 40 |
| 173 | F | NT     | NT        | NT     |  | ND | 55 |
| 174 | F | 8/18   | 0101/1501 | 7/ 8   |  | ND | 35 |
| 175 | F | 22/ 51 | 1001/ 11  | 6neg   |  | ND | 53 |
| 176 | F | 7/ 7   | 1301/1501 | 7/ 7   |  | ND | 55 |
| 177 | F | 18/44  | 07/16     | 6/ 4   |  | ND | 16 |
| 178 | F | 7/ 27  | 801/1101  | 15/ 16 |  | ND | 50 |
| 179 | F | 7/ 38  | 1301/1501 | NT     |  | ND | 55 |
| 180 | F | 8/62   | 401/03    | NT     |  | 0  | 50 |
| 181 | F | 07/38  | 01/07     | 6/ 7   |  | ND | 21 |
| 182 | F | NT     | NT        | NT     |  | ND | 42 |
| 183 | F | 18/44  | 07/11     | NT     |  | 0  | 47 |
| 184 | F | 44/49  | 07/11     | 7/16   |  | ND | 40 |
| 185 | F | NT     | 301/1501  | NT     |  | ND | 46 |
| 186 | F | 51/51  | 08/08     | 14/15  |  | ND | 40 |
| 187 | F | 8/58   | 11/13     | 7/7    |  | ND | 57 |
| 188 | F | 44/51  | 7/15      | NT     |  | 0  | 30 |
| 189 | F | 50/51  | 0403/1201 | 6/14   |  | ND | 50 |
| 190 | F | 14/35  | 07/14     | NT     |  | 0  | 40 |
| 191 | F | 7/ 37  | 701/1302  | 6/7    |  | 0  | 20 |
| 192 | F | 27/ 60 | 103/11    | 1/ 3   |  | ND | 25 |
| 193 | H | 08/35  | 03/07     | 4/ 7   |  | 0  | NR |
| 194 | H | 18/ 35 | 101/1104  | NT     |  | ND | 31 |
| 195 | H | 44/NT  | NT        | NT     |  | ND | 49 |
| 196 | H | 18/18  | 101/101   | 5/ 7   |  | 0  | 44 |



|  |  |  |  |  |  |  |  |
|--|--|--|--|--|--|--|--|
|  |  |  |  |  |  |  |  |
|--|--|--|--|--|--|--|--|

| duration (years) | ANTI ENA   | ACPA | RF     | Dactylitis | Enthesitis | familial psoriasis | psoriasis    |
|------------------|------------|------|--------|------------|------------|--------------------|--------------|
| NR               | neg        | nef  | 37     | 0          | hill       | no                 | hand foot    |
| 6                | neg        | neg  | neg    | 1          | no         | no                 | leg          |
| 0                | neg        | neg  | neg    | 1          | gluteus    | yes                | no           |
| 1                | neg        | neg  | neg    | 0          | gluteus    | yes                | skin         |
| 11               | neg        | neg  | neg    | 0          | yes        | no                 | hand         |
| 0                | neg        | neg  | neg    | 0          | elbow      | no                 | hair         |
| 1                | neg        | neg  | neg    | NR         | no         | no                 | skin         |
| NR               | neg        | 49   | neg    | NR         | hill       | no                 | no           |
| NR               | neg        | neg  | 27     | 0          | no         | no                 | diffuse      |
| 4                | neg        | neg  | neg    | NR         | no         | no                 | no           |
| 6                | neg        | neg  | neg    | 0          | hill       | no                 | nail         |
| 0                | neg        | neg  | 50     | 0          | no         | no                 | no           |
| 1                | neg        | neg  | 78     | 0          | no         | no                 | no           |
| 4                | neg        | neg  | neg    | 0          | hill       | yes                | no           |
| NR               | neg        | neg  | neg    | 0          | hill       | no                 | hair         |
| 4                | neg        | neg  | neg    | 0          | gluteus    | no                 | nail         |
| 1                | neg        | neg  | neg    | 0          | no         | no                 | hair, foot   |
| 1                | neg        | neg  | neg    | 0          | no         | yes                | hand foot    |
| 4                | neg        | neg  | neg    | 1          | no         | yes                | hair         |
| 0                | neg        | neg  | neg    | 0          | hill       | yes                | no           |
| 0                | neg        | neg  | neg    | 1          | no         | no                 | elbow,       |
| 3                | SSA pos 16 | neg  | neg    | 0          | gluteus    | no                 | diffuse      |
| 4                | neg        | neg  | neg    | 0          | no         | no                 | no           |
| 20               | neg        | neg  | 50     | 0          | no         | no                 | diffuse      |
| 5                | neg        | neg  | neg    | 0          | no         | no                 | diffuse      |
| 7                | neg        | neg  | neg    | 1          | no         | no                 | diffuse      |
| 11               | neg        | neg  | neg    | 0          | no         | yes                | leg          |
| 5                | neg        | neg  | neg    | 0          | no         | yes                | diffuse      |
| 3                | neg        | neg  | 27     | 0          | no         | no                 | nail         |
| 2                | neg        | neg  | neg    | 0          | no         | no                 | diffuse hair |
| NR               | neg        | neg  | neg    | 1          | no         | no                 | diffuse      |
| NR               | SSA pos    | neg  | 34     | 0          | no         | yes                | diffuse      |
| NR               | ssa pos    | neg  | neg    | 0          | no         | yes                | nail ?       |
| 7                | neg        | neg  | neg    | 0          | no         | yes                | diffuse      |
| NR               | neg        | neg  | 20     | 1          | no         | no                 | diffuse      |
| 0                | neg        | neg  | neg    | 0          | no         | no                 | diffuse hair |
| NR               | neg        | neg  | 23     | 1          | no         | no                 | diffuse      |
| NR               | neg        | neg  | 74     | 1          | hill       | yes                | diffuse      |
| NR               | neg        | neg  | neg    | 1          | no         | no                 | diffuse      |
| NR               | neg        | neg  | neg    | 0          | multiple   | no                 | cc elbow     |
| NR               | neg        | neg  | neg    | 0          | multiple   | yes                | diffuse      |
| NR               | neg        | neg  | 35     | 0          | no         | yes                | cc elbow     |
| 2                | neg        | neg  | pos 29 | 0          | no         | yes                | diffuse      |
| 0                | neg        | neg  | 31     | 0          | hill       | no                 | ear          |
| NR               | neg        | neg  | neg    | 0          | hill       | no                 | diffuse      |
| 0                | neg        | neg  | neg    | 0          | hill       | yes                | diffuse nail |
| 16               | neg        | neg  | neg    | 1          | gluteus    | no                 | hair         |
| 2                | neg        | neg  | neg    | 0          | ?          | no                 | foot         |
| 5                | neg        | neg  | neg    | 0          | gluteus    | yes                | diffuse      |

|    |            |     |        |    |          |     |                    |
|----|------------|-----|--------|----|----------|-----|--------------------|
| 1  | neg        | neg | neg    | 0  | hill     | yes | diffuse            |
| 2  | neg        | neg | neg    | 0  | hill     | ?   | hair               |
| 1  | neg        | neg | neg    | 1  | hill     | yes | diffuse            |
| 3  | neg        | neg | neg    | NR | no       | no  | no                 |
| 7  | neg        | neg | neg    | 1  | hill     | yes | no                 |
| 1  | neg        | neg | neg    | 0  | no       | no  | no                 |
| 45 | neg        | neg | neg    | 1  | no       | no  | no                 |
| 5  | neg        | neg | neg    | 0  | no       | no  | diffuse            |
| 5  | neg        | neg | neg    | 0  | no       | yes | diffuse            |
| 8  | neg        | neg | neg    | 0  | no       | no  | diffuse            |
| 2  | neg        | neg | neg    | 0  | hill     | no  | hair               |
| 17 | neg        | neg | neg    | 0  | no       | no  | no                 |
| 1  | neg        | neg | neg    | 0  | no       | no  | diffuse            |
| NR | neg        | neg | neg    | 0  | hill     | no  | hair nail          |
| NR | SSA pos 38 | neg | neg    | 0  | hill     | no  | diffuse            |
| 10 | neg        | neg | neg    | 1  | gluteus  | no  | nail               |
| NR | neg        | neg | 25     | 0  | no       | no  | diffuse hand       |
| NR | neg        | neg | neg    | 0  | no       | yes | no                 |
| NR | neg        | neg | pos 21 | 0  | no       | no  | hair               |
| 6  | neg        | neg | neg    | 0  | no       | no  | hair               |
| 0  | neg        | neg | neg    | 0  | no       | no  | no                 |
| 16 | neg        | neg | neg    | 0  | no       | no  | diffuse            |
| 0  | neg        | neg | neg    | 1  | no       | no  | hair elbow knees   |
| 5  | neg        | neg | neg    | 1  | gluteus  | no  | diffuse            |
| 3  | neg        | neg | neg    | 0  | no       | yes | diffuse+++         |
| 9  | neg        | neg | neg    | 0  | no       | no  | diffuse            |
| 9  | neg        | neg | neg    | 0  | no       | yes | diffuse nail       |
| NR | neg        | 27  | neg    | 0  | no       | no  | elbow              |
| 15 | neg        | neg | 25     | 0  | no       | no  | diffuse            |
| 5  | neg        | neg | 36     | NR | no       | no  | no                 |
| 1  | neg        | neg | neg    | 0  | no       | yes | diffuse            |
| 2  | neg        | neg | 20     | 0  | no       | yes | no                 |
| 0  | neg        | neg | neg    | 1  | multiple | yes | diffuse            |
| 4  | neg        | neg | neg    | 0  | no       | no  | knee elbow         |
| 13 | neg        | neg | neg    | 0  | gluteus  | no  | leg                |
| 7  | neg        | neg | neg    | 0  | no       | no  | no                 |
| 18 | neg        | neg | neg    | 0  | multiple | yes | diffuse            |
| 2  | neg        | neg | neg    | 1  | multiple | no  | hair elbow diffuse |
| 7  | neg        | neg | neg    | 1  | multiple | no  | hair,hand          |
| 3  | neg        | neg | neg    | 0  | hill     | yes | diffuse            |
| 11 | neg        | neg | neg    | 0  | no       | yes | nail               |
| 6  | neg        | neg | pos 30 | 1  | wrist    | ?   | diffuse            |
| 6  | neg        | neg | neg    | 0  | hill     | ?   | diffuse            |
| 8  | neg        | neg | neg    | 0  | hill     | yes | diffuse            |
| 2  | neg        | neg | 50     | 0  | no       | no  | elbow hair         |
| NR | neg        | neg | neg    | 0  | no       | no  | diffuse            |
| 0  | neg        | neg | neg    | 1  | no       | no  | no                 |
| 5  | neg        | neg | neg    | 0  | no       | no  | hair               |
| 3  | neg        | neg | neg    | 0  | multiple | no  | foot               |



|    |     |     |     |     |          |     |                   |
|----|-----|-----|-----|-----|----------|-----|-------------------|
| 2  | neg | neg | neg | 0   | no       | no  | hair              |
| 5  | neg | neg | neg | 0   | no       | yes | diffuse           |
| 7  | neg | neg | neg | 0   | hill     | ?   | knee nail         |
| 5  | neg | neg | neg | 0   | no       | no  | diffuse           |
| 4  | neg | neg | neg | 0   | no       | yes | hair              |
| 1  | neg | neg | neg | 1   | hill     | no  | diffuse           |
| 3  | neg | neg | neg | 0   | hill     | no  | hair              |
| 2  | neg | neg | neg | 0   | hill     | no  | diffuse           |
| 0  | neg | neg | neg | 0   | no       | no  | no                |
| 7  | neg | neg | neg | 0   | hill     | yes | diffuse           |
| 0  | neg | neg | neg | NR  | no       | no  | no                |
| 2  | neg | neg | neg | 0   | no       | no  | diffuse           |
| 0  | neg | neg | neg | 0   | hill     | no  | diffuse           |
| 1  | neg | neg | neg | 0   | hill     | no  | diffuse           |
| 2  | neg | neg | neg | 0   |          | yes | diffuse elbow     |
| 9  | neg | neg | neg | 0   | hill     | no  | diffuse nail hair |
| 0  | neg | neg | 24  | 0   | ?        | no  | hair              |
| 10 | neg | neg | 22  | 1   | gluteus  | no  | diffuse hand      |
| 2  | neg | neg | neg | 0   | wrist    | yes | diffuse           |
| 5  | neg | neg | neg | 0   | no       | no  | diffuse hair nail |
| 0  | neg | neg | neg | 0   | no       | no  | diffuse           |
| 0  | neg | neg | neg | 0   | gluteus  | yes | diffuse           |
| 1  | neg | neg | neg | 1   | multiple | no  | hand              |
| 0  | neg | neg | neg | 0   | hill     | no  | hair              |
| 6  | neg | neg | neg | 0   | no       | ?   | diffuse           |
| 12 | neg | neg | neg | 0   | 0        | no  | diffuse           |
| 1  | neg | neg | neg | 0   | gluteus  | yes | diffuse           |
| 37 | neg | neg | neg | 0   | no       | ?   | diffuse           |
| 4  | neg | neg | neg | 0   | no       | ?   | ?                 |
| 1  | neg | neg | 24  | 1   | no       | ?   | hand foot         |
| 0  | neg | neg | neg | 0   | no       | ?   | nail hand foot    |
| 15 | neg | neg | neg | 1++ | knee     | yes | diffuse           |
| 19 | neg | neg | neg | 0   | wrist    | no  | knee              |
| 4  | neg | neg | neg | 0   | no       | ?   | knee              |
| 24 | neg | neg | neg | 0   | no       | no  |                   |
| 0  | neg | neg | neg | 0   | no       | no  | nail hand foot    |
| 0  | neg | neg | neg | 0   | hill     | yes | no                |
| 7  | neg | neg | neg | 0   | hill     | ?   | diffuse           |
| 1  | neg | neg | neg | 1   | hill     | yes | diffuse           |
| NR | neg | neg | neg | 1   | no       | no  | diffuse           |
| 2  | neg | neg | 34  | 0   | no       | no  | diffuse           |
| 6  | neg | neg | neg | 0   | no       | no  | no                |
| NR | neg | neg | neg | 0   | no       | yes | no                |
| 0  | neg | neg | neg | 0   | multiple | no  | hair              |
| 5  | neg | neg | neg | 0   | gluteus  | yes | diffuse           |
|    | neg | neg | neg | 0   | multiple | yes | hair              |
| 6  | neg | neg | neg | 1   | multiple | yes | diffuse           |
| 0  | neg | neg | neg | 1   | no       | no  | hair              |
| 5  | neg | neg | neg | 0   | gluteus  | yes | elbow             |

|    |     |       |        |    |          |     |                 |
|----|-----|-------|--------|----|----------|-----|-----------------|
| 9  | neg | neg   | neg    | 1  | no       | yes | hair nail       |
| 4  | neg | neg   | neg    | 0  | no       | no  | elbow           |
| 11 | neg | neg   | neg    | 1  | multiple | yes | elbow           |
| 13 | neg | neg   | neg    | 0  | hill     | yes | diffuse         |
| 5  | neg | neg   | neg    | 0  | no       | yes | diffuse         |
| 4  | neg | neg   | neg    | 0  | no       | no  | no              |
| 6  | neg | neg   | neg    | 0  | no       | yes | elbow hair      |
| 0  | neg | neg   | neg    | NR | no       | no  | no              |
| 4  | neg | neg   | neg    | 0  | hill     | no  | hair nail elbow |
| 0  | neg | neg   | neg    | 0  | gluteus  | ?   | foot nail       |
| 5  | neg | neg   | neg    | 0  | hill     | yes | diffuse         |
| 0  | neg | neg   | neg    | 0  | no       | no  | diffuse         |
| 6  | neg | neg   | 40     | 1  | hill     | no  | hair elbow      |
| 1  | neg | neg   | neg    | 1  | no       | yes | nail            |
| 6  | neg | neg   | neg    | 1  | hill     | no  | hand            |
| 5  | neg | neg   | neg    | 0  | no       | no  | diffuse         |
| 5  | neg | neg   | neg    | 0  | no       | no  | diffuse         |
| 5  | neg | neg   | neg    | 0  | wrist    | yes | diffuse         |
| 5  | nrg | neg   | 32     | NR | no       | yes | no              |
| 10 | neg | neg   | neg    | 0  | hill     | yes | hair            |
| 0  | neg | neg   | neg    | 1  | no       | yes | diffuse         |
| 1  | neg | neg   | neg    | 1  | hill     | no  | elbow, foot     |
| 6  | nrg | Pos22 | neg    | 0  | no       | no  | hair            |
| 10 | neg | neg   | neg    | 0  | no       | ?   | diffuse         |
| 0  | neg | neg   | neg    | 0  | hill     | ?   | elbow hair      |
| 4  | neg | neg   | neg    | 0  | gluteus  | yes | diffuse         |
| 5  | neg | neg   | pos 21 | 0  | gluteus  | yes | diffuse         |
| 4  | neg | neg   | neg    | 1  | no       | yes | knee            |
| 2  | neg | neg   | neg    | 1  | no       | ?   | diffuse         |
| 1  | neg | neg   | neg    | 0  | no       | yes | diffuse         |
| 6  | neg | neg   | 34     | 1  | no       | no  | hair            |
| 7  | neg | neg   | neg    | 0  | no       | yes | hand foot       |
| 0  | neg | neg   | neg    | 0  | no       | no  | hand foot       |
| 27 | neg | neg   | 34     | 0  | no       | yes | hair elbow      |
| 0  | neg | neg   | neg    | NR | no       | no  | no              |
| 5  | neg | neg   | neg    | 0  | no       | no  | diffuse         |
| 10 | neg | neg   | neg    | 0  | no       | yes | elbow nail      |
| 4  | neg | neg   | neg    | 0  | no       | no  | hair            |
| 28 | neg | neg   | neg    | 1  | hill     | no  | diffuse         |
| 9  | neg | neg   | neg    | 1  | hill     | yes | hair nail       |
| 3  | neg | neg   | 32     | 0  | no       | no  | hair            |
| 9  | neg | neg   | neg    | NR | no       | no  | no              |
| 2  | neg | neg   | neg    | 0  | no       | no  | hair            |
| 13 | neg | neg   | neg    | 0  | no       | no  | diffuse         |
| 22 | neg | neg   | neg    | 0  | 0        | no  | foot            |
| 5  | neg | neg   | 22     | 0  | multiple | no  | diffuse         |
| 0  | neg | neg   | neg    | 0  | no       | no  | no              |
| 0  | neg | neg   | neg    | 1  | no       | no  | diffuse         |
| 6  | neg | neg   | neg    | 0  | multiple | no  | elbow           |



|  |  |  |  |  |  |  |  |
|--|--|--|--|--|--|--|--|
|  |  |  |  |  |  |  |  |
|--|--|--|--|--|--|--|--|













|  |  |  |  |
|--|--|--|--|
|  |  |  |  |
|--|--|--|--|
